# Supplementary material for: Selection of an adjuvant for seasonal influenza vaccine in elderly people: modelling immunogenicity from a randomized trial
Source: PubMed Central journal article supplement (PMC3729430; doi:10.1186/1471-2334-13-348), 2013-07-26
Supplement: 1471-2334-13-348-S1.pdf [file 1471-2334-13-348-S1.pdf]

**Additional file 1. Independent Ethics Committees/Institutional Review Boards**

| <b>No. of centres</b> | <b>Ethics review body</b>                                                                     | <b>Location</b>                                                                         |
|-----------------------|-----------------------------------------------------------------------------------------------|-----------------------------------------------------------------------------------------|
| 3                     | Ethik-Kommission der Ärztekammer Hamburg                                                      | Heinrich-Hertz-Str. 125, 22083 Hamburg, Germany.                                        |
| 4                     | Landesamt für Gesundheit und Soziales, Geschäftsstelle der Ethik-Kommission des Landes Berlin | Sächsische Str. 28, 10707 Berlin, Germany.                                              |
| 2                     | Ethik-Kommission der Landesärztekammer Rheinland-Pfalz                                        | Deutschhausplatz 3, 55116 Mainz, Germany.                                               |
| 4                     | Ethik-Kommission bei der Landesärztekammer Baden-Württemberg                                  | Jahnstraße 40, 70597 Stuttgart, Germany.                                                |
| 2                     | Ethik-Kommission des Landes Sachsen-Anhalt<br>c/o Landesamt für Verbraucherschutz             | Kühnauer Str. 70, 06846 Dessau, Germany.                                                |
| 2                     | Ethikkommission der Ärztekammer Nordrhein                                                     | Tersteegenstraße 9, 40474 Düsseldorf, Germany.                                          |
| 4                     | Ethikkommission bei der Sächsischen Landesärztekammer                                         | Schützenhöhe 16, 01099 Dresden, Germany.                                                |
| 1                     | Ethik-Kommission der Bayerischen Landesärztekammer                                            | Mühlbaurstraße 16, 81677 München, Germany.                                              |
| 2                     | Centrale Commissie Mensgebonden Onderzoek (CCMO)                                              | Parnassusplein 5, 2511 VX Den Haag, The Netherlands.                                    |
| 3                     | Regionala Etikprövningsnämnden i Uppsala                                                      | Box 1964 SE-751 49 Uppsala Sweden.                                                      |
| 5                     | Oxfordshire REC B                                                                             | 2nd Floor Astral House, Chaucer Business Park, Granville Way, Bicester, United Kingdom. |
